# Supplementary material
Source: publisher figshare collection journal article supplement (https://acs.figshare.com/ndownloader/files/5035924)
Supplement: Supplementary file 1 [file 5035924]

# Supporting Information

## High-resolution Identification of Chemical States in Individual Metal Clusters in an Insulating Amorphous Polymer

Yugo Kubo,<sup>\*,†</sup> Akira Mizoguchi,<sup>†</sup> and Jun-ichi Fujita<sup>‡,§</sup>

<sup>†</sup>Analysis Technology Research Center, Sumitomo Electric Industries, Ltd., 1-1-3, Shimaya, Konohana-ku Osaka-shi, Osaka, 554-0024, Japan

<sup>‡</sup>Institute of Applied Physics, Graduate School of Pure and Applied Sciences, University of Tsukuba, 1-1-1, Tennodai, Tsukuba, Ibaraki, 305-8573, Japan

<sup>§</sup>Tsukuba Research Center for Interdisciplinary Materials Science, University of Tsukuba, 1-1-1, Tennodai, Tsukuba, Ibaraki, 305-8573, Japan

**TEM BF image observations.** To overview cross-sections of the samples, TEM BF images were obtained using a microscope (H-9000NAR, Hitachi High-Technologies) operated with an acceleration voltage ( $V_{\text{acc}}$ ) of 200 kV (Figures 2(a)–(d)). BF observations were performed under liquid nitrogen cooling (-70 °C) to reduce damage by electron irradiation.

**Nanobeam electron diffraction.** To identify particles diffusing in the PI layer, nanobeam electron diffraction was performed using a STEM microscope (HD-2000, Hitachi High-Technologies) (Figures 3(m) and 3(n)). The adopted  $V_{\text{acc}}$ , camera length, and beam diameter were 200 kV, 0.8 m, and approximately 30 nm diameter, respectively. Nanobeam electron diffraction was performed under liquid nitrogen cooling (-70 °C).
